# Supplementary material
Source: PubMed Central journal article supplement (PMC3397909)
Supplement: supp_M111.334540_jbc.M111.334540-2.pdf [file supp_M111.334540_jbc.M111.334540-2.pdf]

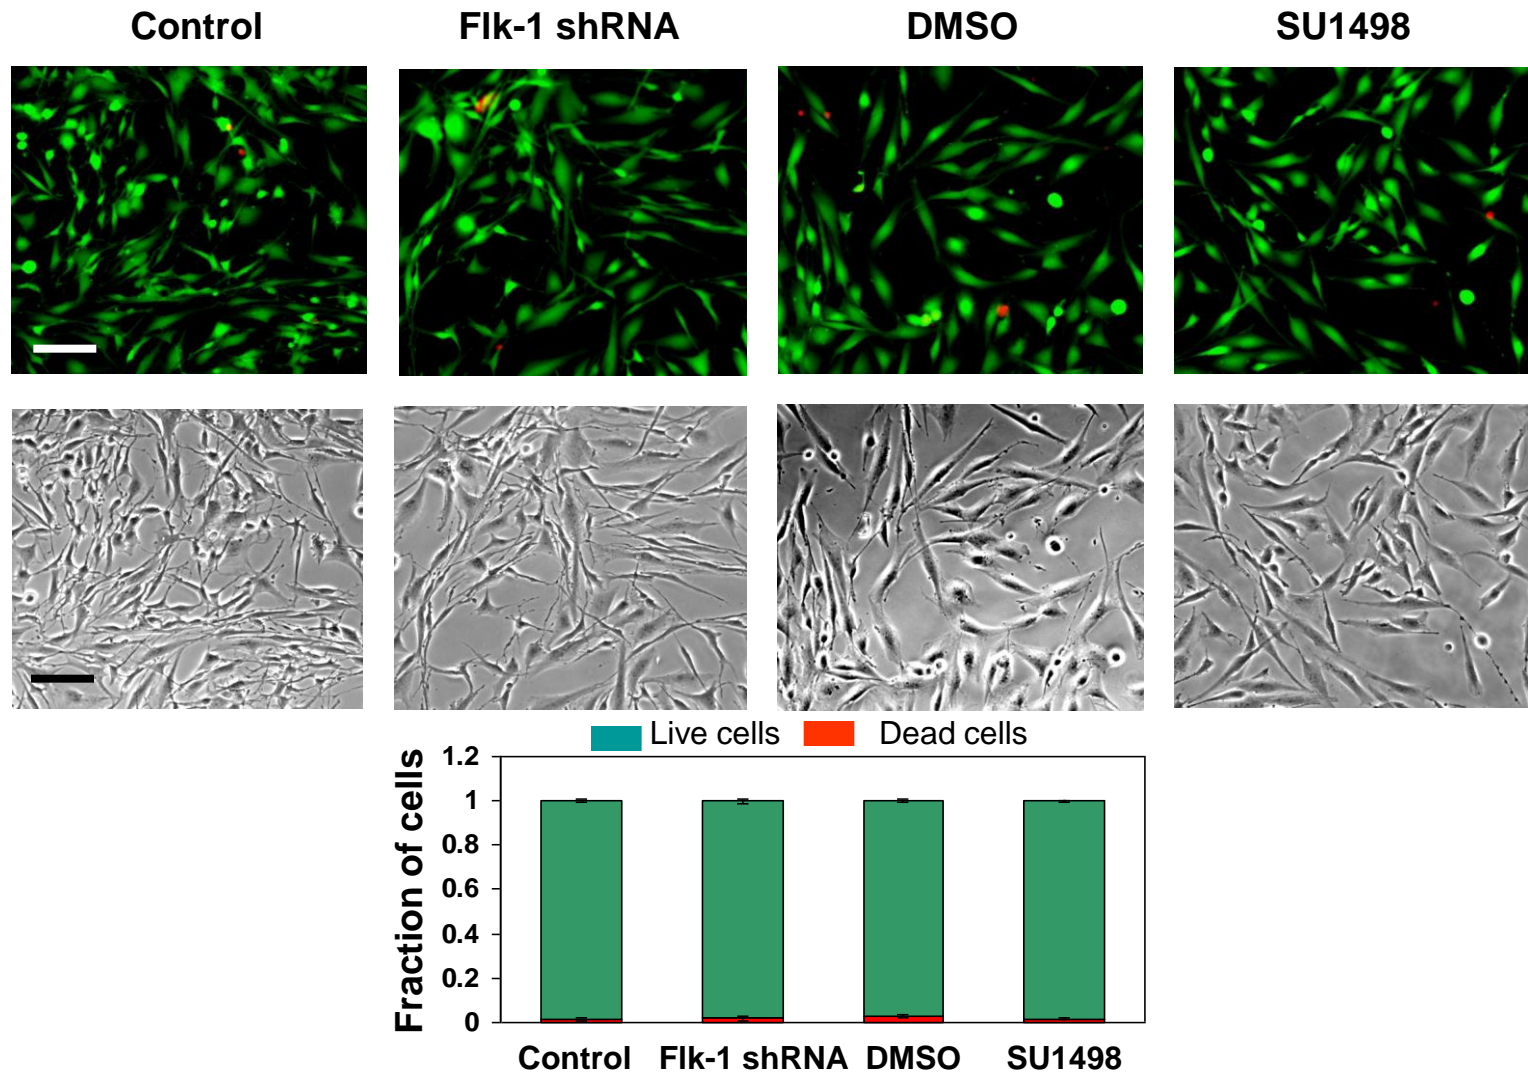

**Supplemental Figure 2. *Flk-1* Inhibition does not cause cell death or impair growth of GBM cells.**

GSDCs were either treated with control shRNA, Flk-1 shRNA, DMSO, or SU1498 (12.5  $\mu$ M). 2 days later, cells were subjected to the Live/Dead Assay (Invitrogen) to measure cell death. Green indicates live cells, as stained by Calcein AM, while red indicates dead cells, as stained by ethidium homodimer (the top panel). Corresponding phase contrast pictures were shown (the middle panel). Quantification of the fraction of living and dead cells for each treatment group. N= 3, P >0.05 (the bottom panel).
